1  
2  
3  
4  
5  
6  
7  
8  
9  
10  
11  
12  
13  
14  
15  
16  
17  
18  
19

A functional spiking-neuron model of activity-silent working memory in humans  
based on calcium-mediated short-term synaptic plasticity

Matthijs Pals<sup>1</sup>, Terrence C. Stewart<sup>2</sup>, Elkan G. Akyürek<sup>3</sup>, & Jelmer P. Borst<sup>1\*</sup>

<sup>1</sup>Bernoulli Institute, University of Groningen, Groningen, The Netherlands.

<sup>2</sup>Centre for Theoretical Neuroscience, University of Waterloo, Waterloo, Ontario, Canada.

<sup>3</sup>Department of Experimental Psychology, University of Groningen, Groningen, The Netherlands.

\*Corresponding author:

E-mail: [j.p.borst@rug.nl](mailto:j.p.borst@rug.nl) (JPB)

## A SPIKING-NEURON MODEL OF ACTIVITY-SILENT WORKING MEMORY

### 20 **Abstract**

21           In this paper, we present a functional spiking-neuron model of human working memory  
22 (WM). This model combines neural firing for encoding of information with activity-silent  
23 maintenance. While it used to be widely assumed that information in WM is maintained through  
24 persistent recurrent activity, recent studies have shown that information can be maintained without  
25 persistent firing; instead, information can be stored in activity-silent states. A candidate mechanism  
26 underlying this type of storage is short-term synaptic plasticity (STSP), by which the strength of  
27 connections between neurons rapidly changes to encode new information. To demonstrate that STSP  
28 can lead to functional behavior, we integrated STSP by means of calcium-mediated synaptic  
29 facilitation in a large-scale spiking-neuron model. The model simulated a recent study that measured  
30 behavior and EEG activity of participants in a delayed-response task. In this task, a visual grating had  
31 to be maintained in WM, and compared to a subsequent probe. It was demonstrated that WM contents  
32 could be decoded from the neural activity elicited by a task-irrelevant stimulus that was displayed  
33 during the activity-silent maintenance period. In support of our model, we show that it can perform  
34 this task, and that both its behavior as well as its neural representations correspond to the human data.  
35 We conclude that information in WM can be effectively maintained in activity-silent states by means  
36 of calcium-mediated STSP.

37

### 38 **Author Summary**

39           Mentally maintaining information for short periods of time in working memory is crucial for  
40 human adaptive behavior. It was recently shown that the human brain does not only store information  
41 through neural firing – as was widely believed – but also maintains information in activity-silent  
42 states. Here, we present a detailed neural model of how this could happen in our brain through short-  
43 term synaptic plasticity: rapidly adapting the connection strengths between neurons in response to  
44 incoming information. By reactivating the adapted network, the stored information can be read out  
45 later. We show that our model can perform a working memory task as accurate as human participants

## A SPIKING-NEURON MODEL OF ACTIVITY-SILENT WORKING MEMORY

46 can, while using similar mental representations. We conclude that our model is a plausible and  
47 effective neural implementation of human working memory.

## A SPIKING-NEURON MODEL OF ACTIVITY-SILENT WORKING MEMORY

### 48 **Introduction**

49           The ability to temporarily hold information in working memory (WM) is a crucial part of  
50 day-to-day life: it is what allows us to remember someone's name at a cocktail party, what ingredients  
51 to buy at the supermarket for dinner, and which platform we need to go to when changing trains [1,2].  
52 The maintenance of information in WM is often studied by means of a delayed-response task, in  
53 which a briefly presented memory item is followed by a delay period [3,4]. The delay period ends  
54 with the presentation of a probe that the participants need to compare to the memorized item. The  
55 maintenance of information during the delay period of such tasks was long thought to be mediated by  
56 continuously spiking neurons [5,6]. Although neural spiking is certainly important for WM, it was  
57 recently shown that spiking activity during delay periods can be intermittent or even absent [7–11].  
58 This suggests that information may be stored instead using activity-silent mechanisms, for instance  
59 through transient connectivity patterns in the brain [2,12,13]. The spiking activity observed previously  
60 might reflect the initial phase necessary to initialize new synaptic weights, active maintenance of the  
61 focus of attention [14–17], or the read-out of information from working memory [13,18].

62           One of the candidate mechanisms for storing information in activity-silent states is short-term  
63 synaptic plasticity [STSP; 19], which entails rapid changes in the strength of connections between  
64 neurons to reflect new information being presented to the network [12]. Indeed, it was previously  
65 shown that synapses in areas implicated in WM can be facilitated [20,21], potentially as a  
66 consequence of residual calcium building up in presynaptic terminals [19,22]. In this way residual  
67 calcium effectively leaves a 'synaptic trace' of what is currently stored in WM. An elegant  
68 implementation of activity-silent storage by means of STSP was proposed by Mongillo and  
69 colleagues [12], who developed a model that can maintain information through calcium-mediated  
70 synaptic facilitation in recurrent networks of simulated spiking neurons. In response to a particular  
71 input to the network, a subset of the neurons fires, with the result that their outgoing connections are  
72 facilitated. Subsequently, stored information can be read out by applying a network-wide non-specific  
73 input that will be mostly subthreshold for non-facilitated neurons but leads to firing of facilitated  
74 neurons.

## A SPIKING-NEURON MODEL OF ACTIVITY-SILENT WORKING MEMORY

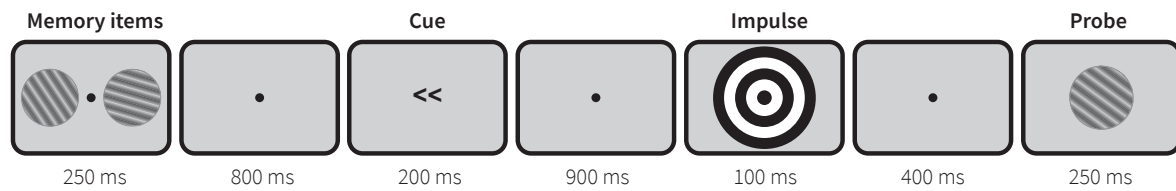

**Fig 1. The retro-cue delayed-response task.** After the presentation of the memory items, a cue indicates which grating needs to be maintained in WM for judgement of the probe. Decodable EEG activity is elicited by the task-neutral impulse, which is presented between the cue and the probe.

75            In the current study, we show that the mechanism proposed by Mongillo and colleagues [12]  
76 not only results in efficient and robust storage, but also in effective, functional human behavior. We  
77 integrated their calcium-mediated STSP mechanism in a large-scale spiking-neuron model that can  
78 perform a delayed-response task. To evaluate this model, we used a previously reported  
79 electroencephalography (EEG) dataset of a visual WM task, in which activity-silent memory states  
80 were measured [3]. To this end, Wolff and colleagues developed an innovative method to probe  
81 activity-silent brain states [3,23]. They showed that when the WM network is perturbed by a high-  
82 contrast task-neutral stimulus during maintenance, ensuing neural activity reveals what is currently  
83 held in an activity-silent state.

84            In their experiment [3], each trial started with the display of two randomly oriented gratings  
85 (Fig 1). After an 800 ms fixation period, this was followed by a cue indicating which of the two  
86 stimuli had to be maintained in memory. In order to examine the contents of WM during the  
87 subsequent delay part of the trial, an impulse stimulus was presented 900 ms later. At the end of each  
88 trial, participants had to indicate whether a probe stimulus was rotated clockwise or counter-clockwise  
89 with respect to the cued memory item. To track the contents of WM, a decoding analysis was applied  
90 to the EEG data [3]. It was shown that decoding accuracy quickly dropped to chance level after  
91 presentation of the memory items, but returned when the probe was presented. This indicates that  
92 between the presentation of the memory items and the probe, information is maintained in an activity-  
93 silent (or at least quiescent) state. In addition, it was shown that it is possible to decode the orientation  
94 of the cued memory item from the EEG data in response to the impulse stimulus. Thus, when the WM

## A SPIKING-NEURON MODEL OF ACTIVITY-SILENT WORKING MEMORY

95 network was perturbed by a task-neutral stimulus, the ensuing signal allowed for decoding of the  
96 current contents of the activity-silent state. Interestingly, already after the presentation of the cue, only  
97 the orientation of the cued memory item could be decoded, indicating that the uncued stimulus was  
98 quickly forgotten, or actively cleared from memory.

99 To test our model, we let it perform the same experiment – including the application of the  
100 impulse perturbation method – and compared both our model’s performance as well as its mental  
101 representations and underlying spiking behavior to the human data.

102

## 103 **Results**

### 104 **Model Architecture**

105 In order to implement a functional spiking-neuron model of WM we used Nengo, a  
106 framework for building large-scale brain models that link single cell activity to demonstrative  
107 cognitive abilities [24–26]. In this framework, information is represented by vectors of real numbers  
108 that can be encoded and decoded from the collective spiking activity of a population of neurons.  
109 Connections between neural populations allow for both communication and transformation of  
110 information. Here, Nengo acts as a ‘neural compiler’: given a desired function, the connection weight  
111 matrix between populations is calculated so that this function is approximated. Besides pre-  
112 calculating connection weights, plasticity can be introduced by making use of biologically plausible  
113 learning rules [27].

114 To account for short-term synaptic plasticity, we integrated the calcium kinetics mechanism  
115 proposed by Mongillo and colleagues [12] in the model. Accordingly, synaptic efficiency between  
116 two neurons is dependent on two parameters: the amount of available resources to the presynaptic  
117 neuron (reflecting neurotransmitters) and the presynaptic calcium level. Each time a neuron fires, the  
118 amount of available resources decreases, reducing synaptic efficiency. As resources are quickly  
119 replenished (in the order of 200 ms), this results in short-term depression of firing rates. However, at  
120 the same time calcium flows into the presynaptic terminals, *increasing* synaptic efficiency. Because

## A SPIKING-NEURON MODEL OF ACTIVITY-SILENT WORKING MEMORY

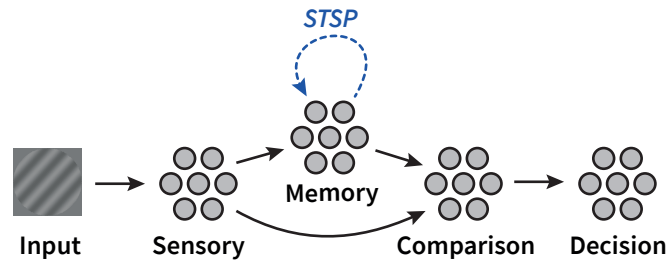

**Fig 2. Model architecture.** The model is divided in two modules (only one is pictured) representing the two visual hemispheres. Stimuli enter via a sensory population that transforms the input into a vector. This vector is then sent to a recurrently connected memory population exhibiting STSP. The comparison population integrates information from both the sensory and memory ensembles, the result of which is interpreted by the decision population.

121 calcium is much slower to return to its baseline levels than the resources, the synaptic connection is  
122 facilitated in the long-term, for about 1.5 seconds.

123 This STSP mechanism was applied to the recurrent connections of two working memory  
124 populations in our model. As described above, the aim is to simulate a dataset of a delayed-response  
125 task in which the orientation of two memory items has to be compared to a probe ([3]; Fig 1). In this  
126 task, significant EEG lateralization was observed at posterior electrodes after presentation of the cue.  
127 We therefore hypothesized that distinct populations of neurons are responsible for processing visual  
128 stimuli presented in the left and right visual field. Correspondingly, the model was divided into two  
129 independent modules, each responsible for perceiving and representing one of the two incoming  
130 stimuli (Fig. 2).

131 In order to demonstrate that our model is able to deal with real-world input, the stimuli from  
132 [3] were presented to the model. The sensory populations use two-dimensional Gabor filters as  
133 encoders [25,28,29]. As a result, the information present in the gratings – including their direction – is  
134 encoded into 24-dimensional vectors that are passed on to the memory populations. That is, the  
135 information encoded into the neurons is a compressed representation of the input image, using the top  
136 24 singular values as per SVD (see Methods for more details). The memory populations contain  
137 recurrent connections exhibiting STSP, in line with previous models of WM and anatomical areas

## A SPIKING-NEURON MODEL OF ACTIVITY-SILENT WORKING MEMORY

138 associated with WM [e.g., 21,30,31]. Consequently, the first stimulus during a trial will drive  
139 facilitation of recurrent connections representing this stimulus. Neural activity resulting from  
140 subsequent stimuli will be affected by this change in connectivity.

141 This enables implementing decision making as a match-filter process [8,13]. To decide on the  
142 orientation change of the probe compared to the relevant memory item, both the sensory and memory  
143 populations communicate the orientation of the gratings to a comparison population. When a probe is  
144 presented, the orientation received from the sensory population is driven entirely by the incoming  
145 stimulus. However, the orientation of the memory population is driven by a dynamic combination of  
146 activity resulting from the incoming stimulus and activity from facilitated connections as a result of  
147 the encoded memory item (i.e. hysteresis). In other words, the orientation represented by the memory  
148 population reflects the orientation of the probe ‘tuned’ by the orientation of the memory item stored in  
149 facilitated synapses, over time reverting to the new probe stimulus. To estimate the orientation  
150 difference between the memory item and the probe, the outgoing connections from the comparison  
151 layer subtract the two represented orientations. The resulting one-dimensional value reflects the  
152 signed difference between the orientation of the memory item and that of the probe stimulus.

153

### 154 **Neural representations**

155 The model simulated the experiment reported in [3] and illustrated in Fig 1. In the original  
156 paper, it was shown that decoding accuracy quickly dropped after presentation of the memory items  
157 but returned again during presentation of the probe – as would be expected for an activity-silent  
158 maintenance mechanism. Correspondingly, we examined the spiking activity and quality of  
159 representations of our model during the task, in order to validate that any maintenance of information  
160 in our model is realized in activity-silent states and not by persistent firing.

161 Fig 3 shows the spiking activity of the neurons in the memory populations of both modules  
162 during one trial (A: cued module, B: uncued module), together with the mean amount of resources ( $x$ )  
163 and calcium ( $u$ ) in these populations. In both modules, there is spiking activity during and shortly  
164 after presentation of the memory items, the impulse stimulus, and the probe, but not in between. The



## A SPIKING-NEURON MODEL OF ACTIVITY-SILENT WORKING MEMORY

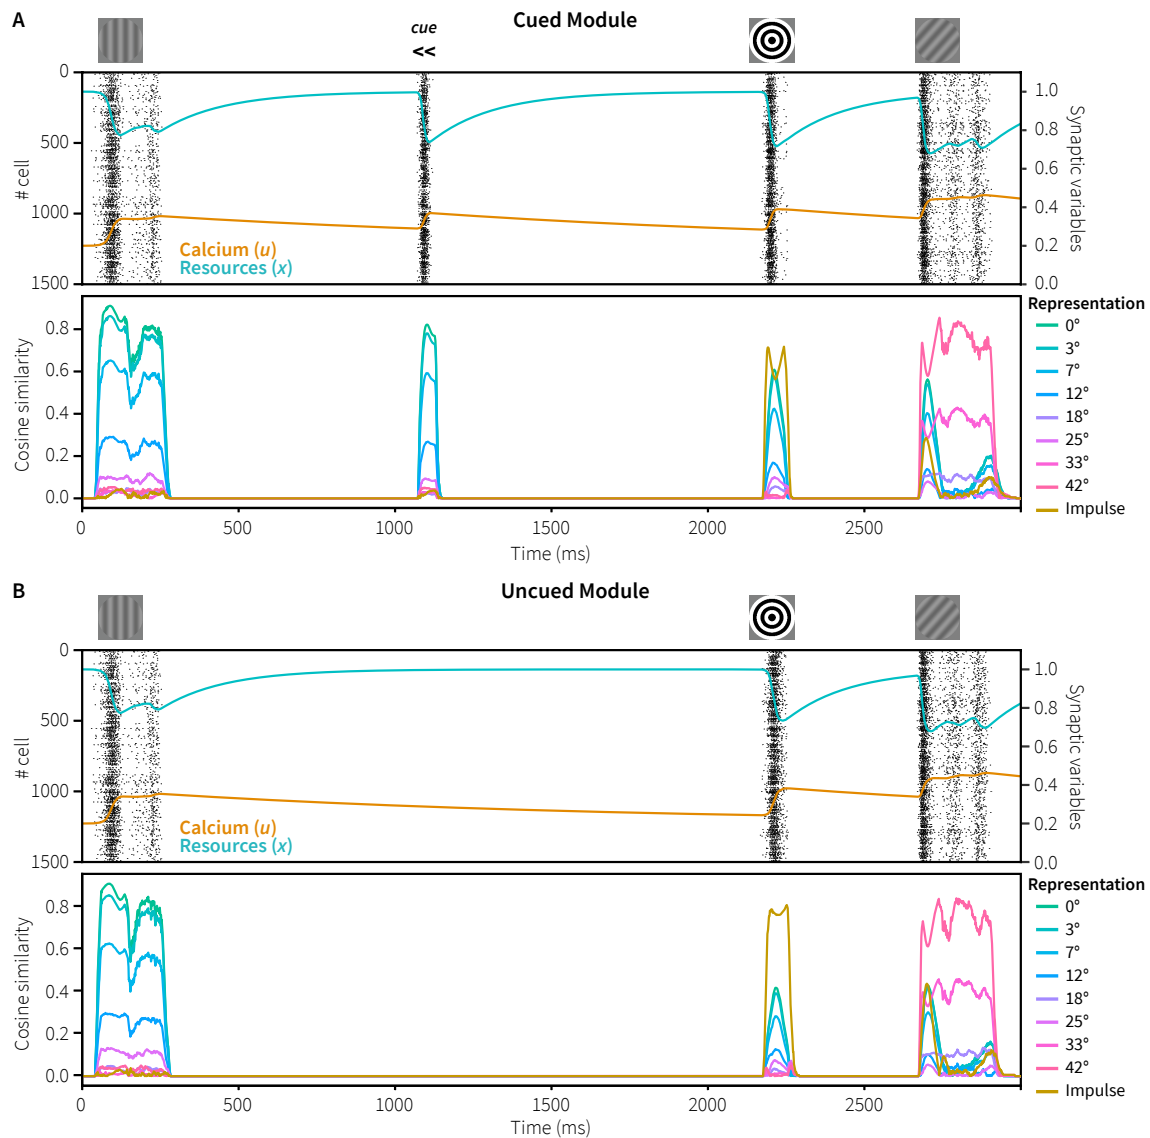

**Fig 3. Spiking behavior and representations.** Top: spiking activity of the memory populations of the cued (left) and uncued (right) modules, including resource and calcium levels during a trial. Bottom: cosine similarity between the vector represented by the memory populations and ideal vectors, averaged over 100 trials with 0° memory items and 42° probes with constant within-trial phase.

165 spiking activity causes the amount of available resources and the calcium level to decrease and  
166 increase, respectively. The resulting short-term depression can directly be observed as the amount of  
167 spiking declines after the onset of a stimulus, although it periodically reactivates.

168 In the original experiment, a retro-cue that indicated which of the two previously presented  
169 items needed to be memorized was presented 800 ms later, which was followed by significant

## A SPIKING-NEURON MODEL OF ACTIVITY-SILENT WORKING MEMORY

170 lateralization at posterior electrodes. To mimic this, the memory population of the cued module is  
171 briefly reactivated by means of a non-specific population wide input [cf. 12]. This not only re-  
172 activates the memory item, but also helps to maintain the stimulus for a longer time period, as  
173 reactivation of facilitated synapses will lead to re-facilitation of those connections.

174         Next, we analyzed the vectors represented by the memory populations of both the cued and  
175 uncued module. Fig 3 (bottom of each panel) shows the absolute cosine similarity between the vector  
176 represented by the memory populations and the ideal vectors of potential representations. To clearly  
177 illustrate the difference between the two modules, the mean cosine similarity was calculated over 100  
178 trials in which both modules were presented with the same memory item and probe, with a rotation of  
179  $0^\circ$  and  $42^\circ$ , respectively. Note that in the simulation of the real experiment, the cued and uncued  
180 modules are never presented with the same memory item.

181         During presentation of the initial memory item of  $0^\circ$ , the vectors represented by both modules  
182 are very similar to the ideal  $0^\circ$  vector. In addition, the cosine similarity is inversely correlated with the  
183 angular difference between the represented vector of  $0^\circ$  and potential representations, indicating that  
184 similar stimuli are represented by similar vectors and firing patterns. As was the case in the original  
185 experiment, during the delay periods we could not decode what is being represented by the neural  
186 populations as there is no spiking activity – indicating activity-silent memory. However, in response  
187 to the non-specific reactivation of the cued model at 1050 ms, there was spiking activity that clearly  
188 represents the originally encoded vector. It therefore appears that neural connections representing the  
189 memory item were indeed facilitated, and that mainly those connections and neurons get activated in  
190 response to the non-specific reactivation elicited by the cue.

191         One of the main results of the original study was that the EEG activity in response to the  
192 impulse stimulus contained the orientation of the cued memory item, and not of the uncued item [3].  
193 This was taken to show that a stimulus is only maintained in an activity-silent state if it is still needed  
194 for the task. If not, it is quickly forgotten or actively cleared from the network. To see if our model  
195 has both the same storage and forgetting capabilities, we examined the vectors represented by the  
196 memory populations of the cued and uncued module during presentation of the impulse (Fig 4; cf. Fig

## A SPIKING-NEURON MODEL OF ACTIVITY-SILENT WORKING MEMORY

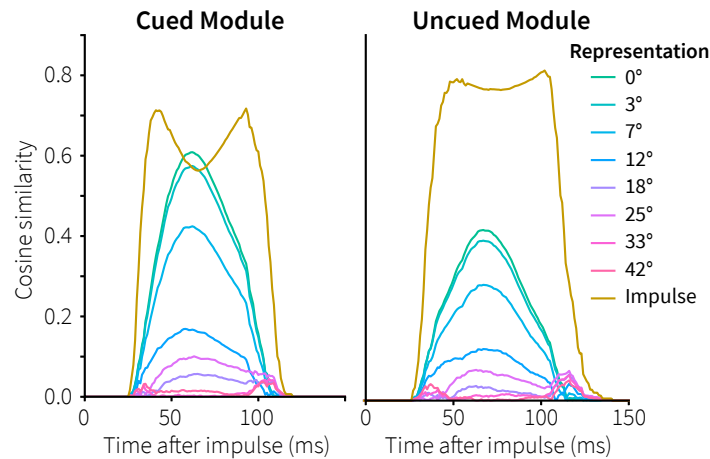

**Fig 4. Cued and uncued memory representations in response to the impulse stimulus.**

Cosine similarity between the representations in the memory populations and ideal vectors in response. The memory item presented before the impulse had a rotation of  $0^\circ$ .

197 3, 2150-2300 ms). In both modules, the memory populations start representing the impulse stimulus.  
198 When the facilitated recurrent connections of the cued and uncued items become activated, both  
199 modules also represent the original  $0^\circ$  memory item. However, only for the cued module does the  
200 represented vector become (very briefly) more similar to the ideal memory item than to the impulse  
201 vector, offering a potential explanation of why only the cued, and not the uncued memory item, could  
202 be decoded after the impulse [3].

203 To summarize: in both the cued and the uncued modules, STSP encodes the initial stimulus.  
204 In the cued model, facilitated connections are re-facilitated at the moment of cue, counteracting the  
205 gradual calcium decay that goes on in both modules (Fig 3). As a result, once the impulse arrives,  
206 only the cued model has sufficiently facilitated connections specific to the memory item to generate a  
207 response larger than the impulse representation (Fig 4). Note that the uncued memory population was  
208 not actively cleared, but that the calcium levels of the facilitated synapses simply decayed away as it  
209 was not reactivated at the moment of the cue.

210

## A SPIKING-NEURON MODEL OF ACTIVITY-SILENT WORKING MEMORY

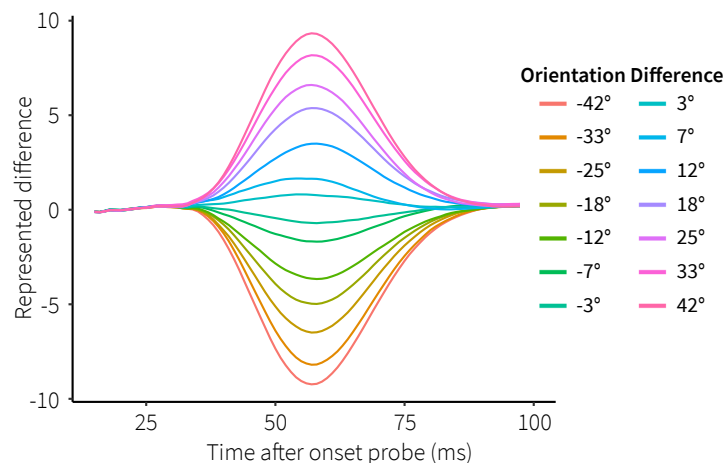

**Fig 5. Represented difference in the decision population.** Colors indicate experimental orientation differences, averaged over all trials.

### 211 Behavior

212 In order to see if our model not only matches neural activity, but also gives rise to functional  
213 behavior similar to human participants, we evaluated its performance. First, to see if the information  
214 maintained in the facilitated synapses can be used to produce a relevant response, we inspected the  
215 value represented by the decision population in the cued module. This population receives the angular  
216 difference between the memory item and the probe from the comparison population, and thus  
217 represents a measure of difference between the orientations decoded from the sensory and memory  
218 populations. Fig 5 shows the represented value for the possible orientation differences between  
219 memory items and probes, averaged over all simulated trials. First, it takes a moment for the probe  
220 information to reach this population. Second, the facilitated synapses become activated, reactivating  
221 the memory item, thereby leading to different representations in the sensory and memory populations,  
222 and thus to a difference in the decision population. Finally, the probe starts overriding the memory  
223 representation, reducing the difference until both populations represent the probe and the difference  
224 has disappeared. Overall, both the sign and magnitude of the orientation difference are clearly  
225 represented in the decision signal.

226 To translate this decision signal into a response, we integrated the decision activation after the  
227 presentation of the probe. Integrating the evidence corresponding to two distinct decisions has been

## A SPIKING-NEURON MODEL OF ACTIVITY-SILENT WORKING MEMORY

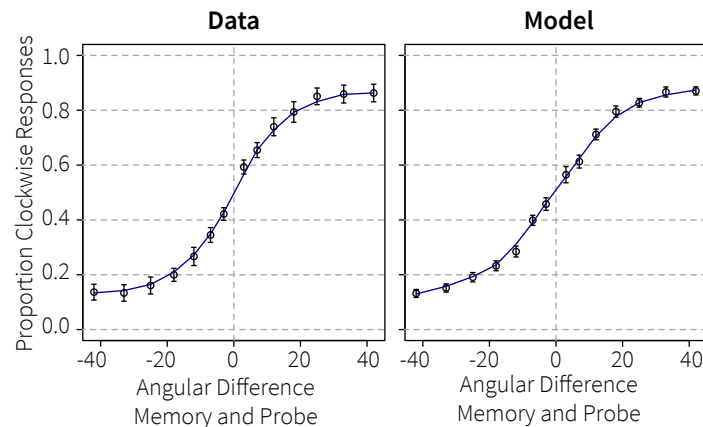

**Fig 6. Performance.** Proportion of clockwise responses dependent on the angular difference between the cued memory item and the probe.

228 widely used before in accumulator models of perceptual decision making [e.g., 32]. We did not model  
229 motor processes, but simply interpreted a positive result as a clockwise response and a negative result  
230 as a counter-clockwise response. Fig 6 shows that the model's proportion of clockwise responses  
231 across orientation differences follows a similar S-shape as the human responses.

232

## 233 Discussion

234 We developed a functional spiking-neuron model to explain recent theories of activity-silent  
235 human working memory. Whereas incoming information is encoded through spiking, maintenance of  
236 information was realized by short-term synaptic plasticity based on calcium kinetics [12]. This  
237 mechanism can maintain information effectively for short periods of time without requiring neural  
238 spiking. In support of the model, we simulated a recent EEG study that applied an innovative impulse  
239 perturbation method [3] to reveal the content of activity-silent WM. Both the model's choice  
240 behavior, as well as its mental representations corresponded well to the human data. This  
241 demonstrates that calcium-mediated STSP not just results in robust maintenance of arbitrary stimuli,  
242 as shown earlier [12], but can also simulate effective human behavior based on real-world stimuli.

243 With regard to localization, the model was used to simulate data from Wolff and colleagues  
244 [3], who reported posterior EEG effects. However, WM is often attributed to prefrontal areas [e.g.,  
245 14,46]. Activity-silent maintenance has likewise been found in both posterior [3,8,47] and frontal

## A SPIKING-NEURON MODEL OF ACTIVITY-SILENT WORKING MEMORY

246 [18,44] regions. It appears that especially sensory working memory should be attributed to the  
247 relevant sensory systems [47,48], instead of to a centralized system. While the exact function of the  
248 different regions implicated in WM might differ, the neural substrate and mechanisms might be  
249 similar, and could potentially all be explained by the proposed STSP mechanism.

250 A number of design choices warrant discussion. First, the employed neurons do not have a  
251 baseline firing rate, as is evident by the lack of any spiking activity during the delay-period of a trial  
252 (Fig 3). In order to clearly demonstrate activity-silent maintenance of information, we defined the  
253 tuning curves of the sensory and memory neurons so that they only fire when presented with input.  
254 However, background firing could simply be added to the model without affecting the functioning of  
255 our model, as has been done in the past ([e.g., 12,33]; see also below). Second, the number of neurons  
256 per population and the number of dimensions used to represent the stimuli were set to reflect human  
257 behavior. In general, adding more neurons will improve the representation of vectors and the  
258 approximation of the functions computed over those. Increasing the number of dimensions expands  
259 what can be represented [25,34,35]. Thus, changing the number of neurons and dimensions will change  
260 the quality of the representations and will influence the number of errors made during the task. Here,  
261 we estimated parameters to roughly match human performance; we do not have a principled reason  
262 either for using 1000 or 1500 neurons per population or 24 dimensions. Finally, information was  
263 represented using Nengo's default vector representation, which provides an intuitive method to link  
264 neural spiking to representation and function [25]. However, representing information differently  
265 should not affect the basic functioning of the model as all connections and the STSP mechanism are  
266 implemented at the neural level.

267

### 268 **Representations in WM**

269 As discussed above, in the current model information is maintained without *any* intermittent  
270 firing (Fig 3). This directly contradicts the original analysis of the dataset [3], where the represented  
271 stimulus could be decoded for some time after its offset. In addition to full activity-silent  
272 maintenance, Mongillo and colleagues [12] observed a bi-stable regime in their model: with added

## A SPIKING-NEURON MODEL OF ACTIVITY-SILENT WORKING MEMORY

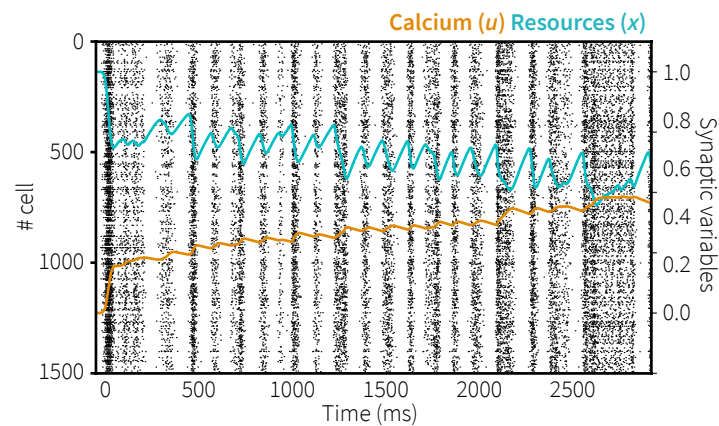

**Fig 7. Bi-stable maintenance.** Background noise puts the model in a bi-stable regime where facilitated connections reactivate spontaneously on the time scale of  $\tau_D$ .

273 background noise, neurons with facilitated connections reactivated spontaneously. Consequently, due  
274 to the dynamics of  $u$  and  $x$ , the reactivated neurons will be briefly depressed before being facilitated  
275 again, leading again to reactivation. In this regime, the time between subsequent reactivations is on  
276 the scale of  $\tau_D$  – the time constant of the available resources – as it is controlled by the recovery from  
277 the synaptic depression. A brief exploratory analysis shows that such a bi-stable regime can also be  
278 added to our model, as is illustrated in Fig 7. This provides the model with an additional method of  
279 maintaining information, possibly over a longer period of time. It also indicates a potential  
280 explanation for the delay-activity observed in the original analysis [3]: non-specific background or  
281 recurrent input after presentation of a stimulus might temporarily have pushed the network into this  
282 regime.

283 A functional role for delay activity in WM might be tracking the focus of attention [15–  
284 17,36]. Wolff and colleagues [3] performed a second experiment, similar to the one discussed in this  
285 paper. Again, two memory items were presented at the start of the trial. However, in this version both  
286 were eventually probed, and participants were aware of which of the two items would be probed first.  
287 Before the first probe, the prioritized item could be much better and longer decoded than the un-  
288 prioritized item, a pattern that reversed after the first probe. This could be simulated with our model  
289 by giving the prioritized item a persistent firing state as in Figure 7, while the un-prioritized item

## A SPIKING-NEURON MODEL OF ACTIVITY-SILENT WORKING MEMORY

290 might be completely maintained in an activity-silent state as in Figure 3. This also provides a  
291 functional explanation for psychological theories that state that a single focal WM item can be used  
292 without any time cost [16,37–39], while other items in working memory incur a cost estimated at 200  
293 ms [15,40–43] – the latter potentially being due to the costs of reactivating the information from a  
294 non-active state.

295 In our model, we have assumed that the coding of the information itself is static, that is, the  
296 same facilitated connections are used repeatedly. However, there has recently been increasing  
297 evidence for a dynamic coding framework, which states that information maintained in a WM  
298 network traverses a highly dynamic path through neural activation [44]. It is not yet clear how this  
299 relates to our model, although a possible clue might come from a model by Singh and Eliasmith [45].  
300 Neural populations in their model represent two dimensions, where one dimension represents time  
301 and the other a stimulus. Their model elegantly captures a wide variety of observed neural responses  
302 during a WM task; the inclusion of time as a dimension represented by the neurons in the network  
303 naturally leads to a dynamic firing pattern over time.

304

### 305 **Related Models**

306 Recently, Myers and colleagues [8] described a related non-spiking neural population model  
307 with similar functionality as the current model, although they did not match human data directly.  
308 Their model consisted of a three-layer architecture: a stimulus layer, a template layer, and a decision  
309 layer not unlike the sensory, memory, and comparison population in our model. A critical difference  
310 between the two models is that their decision layer only receives input from the template layer, while  
311 in our case it receives input from both the sensory and memory populations. The template layer in  
312 Myers' model acts like a match-filter: it is able to maintain a stimulus orientation, and when presented  
313 with a subsequent probe orientation convey the signed difference between the two to the decision  
314 layer. The memory population in our model can likewise be viewed as a match filter. After onset of  
315 the probe, the represented orientation shifts to the orientation of the probe from the direction of the  
316 orientation of the memory item. This shift in itself indicates a degree of difference between the two



## A SPIKING-NEURON MODEL OF ACTIVITY-SILENT WORKING MEMORY

317 orientations, including the sign of this difference. One could potentially measure this with a neural  
318 population that computes a time derivative with respect to the orientation [49]. However, exploratory  
319 analysis indicated this to be less robust than our current method.

320 Another closely related model was proposed by Barak and colleagues [18]. Their model  
321 consisted of a sensory and memory population. After presentation of a stimulus, connections from the  
322 sensory population to the memory population will be facilitated. Subsequently, during the delay  
323 period, an increasing uniform current is applied to the network which activates the neurons in the  
324 memory population that have facilitated incoming connections. During presentation of a subsequent  
325 probe, mutual inhibition between the sensory and memory population will guide decision making.  
326 This model explains observed ramping up of activity during anticipation of a probe. However, it is not  
327 clear whether the gradually increasing external current is essential to extract the information  
328 maintained in the facilitated connections in the memory representation. It can be expected that in the  
329 brain bottom-up stimulus driven activity might also be able to activate the information stored in  
330 connections, for instance when the timing of the probe is unknown.

331

### 332 **Conclusion**

333 To conclude, our model shows that maintenance of information in WM by means of calcium-  
334 mediated STSP can lead to functional behavior. It is broadly consistent with current theories  
335 regarding activity-silent storage in human WM and is able to show a variety of effects observed  
336 during a visual delayed-response task. Furthermore, it provides a solid basis for exploring a model  
337 that incorporates psychological theories on the focus of attention [15–17,37] by combining activity-  
338 silent maintenance with storage through persistent firing.

339

### 340 **Methods**

#### 341 **Model**

342 **Nengo.** The model was implemented using Nengo, a Python library for simulating large-scale  
343 neural models with a clear link between spiking activity and representation [24–26]. Nengo makes use

## A SPIKING-NEURON MODEL OF ACTIVITY-SILENT WORKING MEMORY

344 of a theoretical framework called the Neural Engineering Framework [NEF; 50]. Information is  
345 represented as a vector of real numbers that can be encoded and decoded from the collective spiking  
346 activity of populations of neurons. Encoding is mediated by giving each neuron a non-linear tuning  
347 curve that characterizes their general response to the incoming signal. Decoding is a linear process:  
348 the activity of each neuron in a population is weighted by a constant and summed over time in order  
349 to decode the represented vector. Connections between populations allow for the communication and  
350 transformation of the information. Here the NEF calculates the connection weight matrix between  
351 populations to approximate a desired function. In addition, connection weights can be learned and  
352 adapted through several biologically plausible learning rules, both supervised and unsupervised [27].

353 **Short-term synaptic plasticity.** Short-term synaptic plasticity was implemented in Nengo  
354 following the calcium kinetics mechanism of Mongillo and colleagues ([12]; available at  
355 <https://github.com/Matthijspals/STSP>). Because spiking leaky integrate-and-fire (LIF) neurons are  
356 computationally efficient while retaining a degree of biological plausibility, we added this mechanism  
357 to the existing Nengo implementation of LIF neurons. Synaptic efficiency is based on two parameters:  
358 the amount of available resources to the presynaptic neuron ( $x$ , normalised between 0 and 1) and the  
359 fraction of resources used each time a neuron fires ( $u$ ), reflecting the residual presynaptic calcium  
360 level. When a neuron fires, its resources  $x$  are decreased by  $ux$ , mimicking neurotransmitter depletion.  
361 At the same time, its calcium level  $u$  is increased, mimicking calcium influx into the presynaptic  
362 terminal. Both  $u$  and  $x$  relax back to baseline with time constants  $\tau_D$  (0.2s) and  $\tau_F$  (1.5s), respectively.  
363 This results in a system where after a neuron fires its outgoing connections will be depressed on the  
364 time scale of  $\tau_D$  and facilitated on the timescale of  $\tau_F$  as illustrated in Fig 8.

365 For all LIF neurons to which we apply STSP, every time step  $u$  and  $x$  are calculated according  
366 to equation 1.1 and 1.2, respectively:

$$367 \quad \frac{dx}{dt} = \frac{1-x}{\tau_D} - ux\delta(t-t_{sp}) \quad (1.1)$$

$$368 \quad \frac{du}{dt} = \frac{U-u}{\tau_F} + U(1-u)\delta(t-t_{sp}) \quad (1.2)$$

## A SPIKING-NEURON MODEL OF ACTIVITY-SILENT WORKING MEMORY

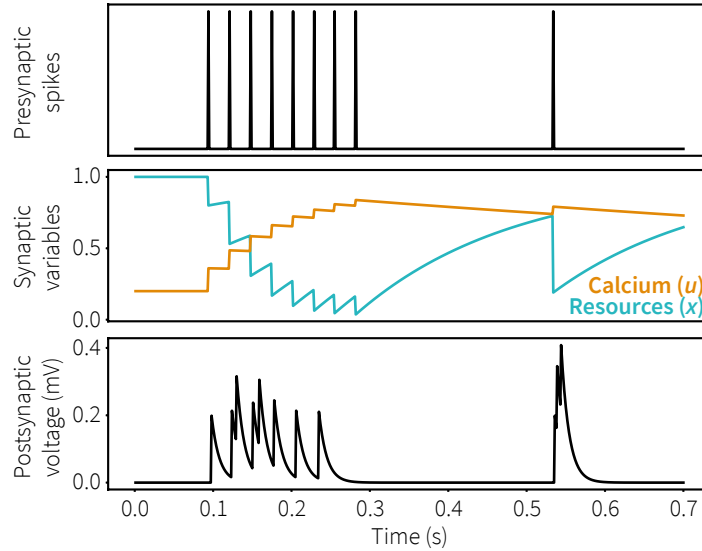

**Fig 8. STSP mechanism.** Top: spikes in presynaptic neuron. Middle: calcium ( $u$ ) and resources ( $x$ ) of presynaptic neuron,  $u$  increases and  $x$  decreases when the presynaptic neuron spikes. Bottom: resulting postsynaptic voltage; note the synaptic depression at the end of the first spike train and synaptic facilitation at the later spike. Nengo reproduction of Fig 1A in [12].

369 where  $x$  represents the available resources,  $u$  the residual calcium level,  $\tau_D$  the depressing time  
 370 constant,  $\delta$  the Dirac delta function,  $t$  the simulation time and  $t_{sp}$  the time of a presynaptic spike. In  
 371 equation 1.2,  $\tau_F$  represents the facilitating time constant and  $U$  the calcium baseline level. Outgoing  
 372 connection weights of neurons implementing STSP are determined by both their initial connection  
 373 weight and their current synaptic efficiency. Initial connections weights are calculated by the NEF,  
 374 while synaptic efficiency is set to the product of the current value of  $u$  and  $x$  of the presynaptic  
 375 neuron, normalised by their baseline value:

$$376 \quad w_{ij} = \frac{xu}{U} w_{ij}^0 \quad (1.3)$$

377 where  $w_{ij}$  represents the connection weight between neuron  $i$  and  $j$  and  $w_{ij}^0$  the initial connection  
 378 weight.

379 **Architecture.** The overall architecture of the model is shown in Fig 2 (the model is available  
 380 for download at <https://github.com/Matthijspals/STSP>). The sensory and decision populations consist  
 381 of 1000 LIF neurons, the memory and comparison populations of 1500 LIF neurons. Biologically

## A SPIKING-NEURON MODEL OF ACTIVITY-SILENT WORKING MEMORY

382 relevant parameters were left to default, which are consistent with neocortical pyramidal cells [24].  
383 Parameters  $U$ ,  $\tau_D$  and  $\tau_F$  were set the same as in [12].  $\tau_F \gg \tau_D$  and  $\tau_F$  on the order of 1s are consistent  
384 with patch-clamp recordings of facilitated excitatory connections in the ferret prefrontal cortex [21].

385 To describe the relationship between neural representations and real-world stimuli it can be  
386 assumed that the brain makes use of a statistical model, not unlikely a parametrized model, where a  
387 small number of parameters capture the overall shape of the data [25]. To find such a model we need  
388 a set of basis functions that will be good at describing both the incoming images and the encoders of  
389 the neurons receiving these images. These basis functions can be found by applying singular value  
390 decomposition (SVD) to a matrix containing both the images and the encoders. The images consisted  
391 of the stimuli in the experiment, while the encoders were two-dimensional Gabor filters, defined by a  
392 sinusoidal plane wave multiplied by a Gaussian function. Gabor filters have previously been shown to  
393 accurately describe the response profile of simple cells in the cat [29] and macaque [28] striate cortex  
394 and seem to underlie early stages of visual processing. Thus, the SVD mediates a biologically  
395 plausible method that results in stimuli being represented by 24-dimensional vectors.

396 Next, we specified for each possible vector – representing a particular grating – what the  
397 corresponding decoded orientation should be. This information was used to define a function that  
398 takes a 24-dimensional vector as input and returns the corresponding orientation. The NEF yields the  
399 connection matrix at the neural level that approximates this function for the connections from the  
400 sensory and memory populations to the comparison populations. Stimulus orientations were not  
401 directly decoded as the angle  $\theta$ , but rather by the sine and cosine of  $\theta$ . Decoding sine and cosine of  $\theta$   
402 is robust, as the ratio between the two determines the stimulus orientation independent of the  
403 amplitude, which is not the case when decoding  $\theta$  directly. Furthermore, the symmetry of the sine  
404 functions provides a natural solution for the symmetric nature of the stimuli, as in the experiment a  
405 stimulus with an orientation of  $-90^\circ$  contains exactly the same pixels as a stimulus with an orientation  
406 of  $90^\circ$  and therefore results in the same neural activity.

407

## A SPIKING-NEURON MODEL OF ACTIVITY-SILENT WORKING MEMORY

### 408 **Experimental Simulation**

409           **Stimuli.** Input to the model consisted of images of 128 by 128 pixels. Stimuli were generated  
410 using Psychopy, an open-source Python application [51]. Stimuli consisted of a circle on a grey  
411 background (RGB = 128, 128, 128). Memory items and probe stimuli were sine-wave gratings with a  
412 diameter of 128 pixels and spatial frequency of 0.034 cycles per pixel. The phase was randomized  
413 within and across trial. For each trial, the orientation of the memory items was randomly selected  
414 from a uniform distribution of orientations. The angular differences between the memory item and the  
415 corresponding probe stimulus were uniformly distributed across seven angle differences (3°, 7°, 12°,  
416 18°, 25°, 33°, 42°), both clockwise and counter-clockwise. The impulse stimulus consisted of a  
417 ‘bull’s-eye’ stimulus of the same size and spatial frequency as the memory items. It was presented at  
418 twice the contrast compared to the grating stimuli, to each module.

419           **Procedure.** The model completed the retro-cue delayed-response task from [3]. Each trial  
420 started with the presentation of two memory items to the sensory population of the corresponding  
421 modules for 250 ms. In the original experiment, a retro-cue that indicated which of the two previously  
422 presented items needed to be memorized was presented 800 ms later, which was followed by  
423 significant lateralization at posterior electrodes. To mimic this, the memory population of the cued  
424 module is briefly reactivated by means of a non-specific population wide input [cf. 12]. After another  
425 fixation period, the impulse stimulus was presented to both sensory populations for 100 ms, 1100 ms  
426 after the onset of the cue. After another delay of 400 ms, the probe was presented to the sensory  
427 populations for 250 ms. To simulate different participants in the experiment, every 1344 trials the  
428 random seed was reset and new random Gabor filters were generated to use as encoders for the  
429 sensory populations. In total the model performed 30 sets of 1344 trials, reflecting 30 participants in  
430 the original experiment.

431

### 432 **References**

- 433 1.     Baddeley AD, Hitch GJ. Working Memory. In: Bower GA, editor. The psychology of learning  
434         and motivation. New York: Academic Press; 1974. pp. 47–89. doi:10.4324/9781912282418

## A SPIKING-NEURON MODEL OF ACTIVITY-SILENT WORKING MEMORY

- 435 2. Barak O, Tsodyks M. Working models of working memory. *Curr Opin Neurobiol.* 2014;25:  
436 20–24. doi:10.1016/j.conb.2013.10.008
- 437 3. Wolff MJ, Jochim J, Akyürek EG, Stokes MG. Dynamic hidden states underlying working-  
438 memory-guided behavior. *Nat Neurosci.* 2017;20: 864–871. doi:10.1038/nn.4546
- 439 4. Rombouts JO, Bohte SM, Roelfsema PR. How attention can create synaptic tags for the  
440 learning of working memories in sequential tasks. *PLoS Comput Biol.* 2015;11: e1004060.  
441 doi:10.1371/journal.pcbi.1004060
- 442 5. Fuster JMJ, Alexander GE. Neuron Activity Related to Short-Term Memory. *Science* (80- ).  
443 1971;173: 652–654.
- 444 6. Goldman-Rakic PS. Cellular basis of working memory. *Neuron.* 1995;14: 477–485.  
445 doi:10.1016/0896-6273(95)90304-6
- 446 7. Lundqvist M, Herman P, Miller EK. Working Memory: Delay Activity, Yes! Persistent  
447 Activity? Maybe Not. *J Neurosci.* 2018;38: 7013–7019. doi:10.1523/JNEUROSCI.2485-  
448 17.2018
- 449 8. Myers NE, Rohenkohl G, Wyart V, Woolrich MW, Nobre AC, Stokes MG, et al. Testing  
450 sensory evidence against mnemonic templates. *Elife.* 2015;4: 1–25. doi:10.7554/eLife.09000
- 451 9. Sreenivasan KK, Curtis CE, D’Esposito M. Revisiting the role of persistent neural activity  
452 during working memory. *Trends Cogn Sci.* 2014;18: 82–89. doi:10.1016/j.tics.2013.12.001
- 453 10. Watanabe K, Funahashi S. Neural mechanisms of dual-task interference and cognitive capacity  
454 limitation in the prefrontal cortex. *Nat Neurosci.* 2014;17: 601–611. doi:10.1038/nn.3667
- 455 11. Lundqvist M, Rose J, Herman P, Brincat SL, Buschman TJ, Miller EK. Gamma and Beta  
456 Bursts Underlie Working Memory. *Neuron.* 2016;90: 152–164.  
457 doi:10.1016/j.neuron.2016.02.028
- 458 12. Mongillo G, Barak O, Tsodyks M. Synaptic Theory of Working Memory. *Science* (80- ).  
459 2008;319: 1543–1546. doi:10.1126/science.1150769
- 460 13. Stokes MG. ‘Activity-silent’ working memory in prefrontal cortex: a dynamic coding  
461 framework. *Trends Cogn Sci.* 2015;19: 394–405. doi:10.1016/j.tics.2015.05.004

A SPIKING-NEURON MODEL OF ACTIVITY-SILENT WORKING MEMORY

- 462 14. Borst JP, Anderson JR. Using Model-Based functional MRI to locate Working Memory  
463 Updates and Declarative Memory Retrievals in the Fronto-Parietal Network. Proc Natl Acad  
464 Sci USA. 2013;110: 1628–1633. doi:10.1073/pnas.1221572110
- 465 15. Borst JP, Taatgen NA, Van Rijn H. The Problem State: A Cognitive Bottleneck in  
466 Multitasking. J Exp Psychol Learn Mem Cogn. 2010;36: 363–382. doi:10.1037/a0018106
- 467 16. Oberauer K. Access to information in working memory: Exploring the focus of attention. J  
468 Exp Psychol Learn Mem Cogn. 2002;28: 411–421.
- 469 17. Olivers CNL, Peters J, Houtkamp R, Roelfsema PR. Different states in visual working  
470 memory: when it guides attention and when it does not. Trends Cogn Sci. 2011;15: 327–334.  
471 doi:10.1016/j.tics.2011.05.004
- 472 18. Barak O, Tsodyks M, Romo R. Neuronal population coding of parametric working memory. J  
473 Neurosci. 2010;30: 9424–9430. doi:10.1523/JNEUROSCI.1875-10.2010
- 474 19. Zucker RS, Regehr WG. Short-Term Synaptic Plasticity. Annu Rev Physiol. 2002;64: 355–  
475 405. doi:10.1146/annurev.physiol.64.092501.114547
- 476 20. Tsodyks M, Pawelzik K, Markram H. Neural Networks with Dynamic Synapses. Neural  
477 Comput. 1998; 821–835.
- 478 21. Wang Y, Markram H, Goodman PH, Berger TK, Ma J, Goldman-Rakic PS. Heterogeneity in  
479 the pyramidal network of the medial prefrontal cortex. Nat Neurosci. 2006;9: 534–542.  
480 doi:10.1038/mn1670
- 481 22. Jackman SL, Regehr WG. The Mechanisms and Functions of Synaptic Facilitation. Neuron.  
482 2017;94: 447–464. doi:10.1016/j.neuron.2017.02.047
- 483 23. Wolff MJ, Ding J, Myers NE, Stokes MG. Revealing hidden states in visual working memory  
484 using electroencephalography. Front Syst Neurosci. 2015;9: 1–12.  
485 doi:10.3389/fnsys.2015.00123
- 486 24. Bekolay T, Bergstra J, Hunsberger E, DeWolf T, Stewart TC, Rasmussen D, et al. Nengo: a  
487 Python tool for building large-scale functional brain models. Front Neuroinform. 2014;7: 48.  
488 doi:10.3389/fninf.2013.00048

A SPIKING-NEURON MODEL OF ACTIVITY-SILENT WORKING MEMORY

- 489 25. Eliasmith C. How to Build a Brain: A Neural Architecture for Biological Cognition. New  
490 York, NY: Oxford University Press; 2013.
- 491 26. Eliasmith C, Stewart TC, Choo X, Bekolay T, DeWolf T, Tang C, et al. A large-scale model of  
492 the functioning brain. *Science* (80- ). 2012;338: 1202–1205. doi:10.1126/science.1225266
- 493 27. Bekolay T, Kolbeck C, Eliasmith C. Simultaneous unsupervised and supervised learning of  
494 cognitive functions in biologically plausible spiking neural networks. *Cognitive Science*  
495 *Society*; 2013. pp. 169–174.
- 496 28. Ringach DL. Spatial Structure and Symmetry of Simple-Cell Receptive Fields in Macaque  
497 Primary Visual Cortex. *J Neurophysiol.* 2002;88: 455–463. doi:10.1152/jn.2002.88.1.455
- 498 29. Jones JP, Palmer LA. An Evaluation of the Two-Dimensional Gabor Filter Model of Simple  
499 Receptive Fields in Cat Striate Cortex. *J Neurophysiol.* 1987;58: 1233–1258.
- 500 30. Camperi M, Wang X-J. A model of visuospatial short-term memory in prefrontal cortex:  
501 recurrent network and cellular bistability. *J Comput Neurosci.* 1998;5: 383–405.
- 502 31. Miller P, Brody CD, Romo R, Wang XJ. A Recurrent Network Model of Somatosensory  
503 Parametric Working Memory in the Prefrontal Cortex. *Cereb Cortex.* 2003;13: 1208–1218.  
504 doi:10.1093/cercor/bhg101
- 505 32. Palmeri TJ, Schall JD, Logan GD. Neurocognitive Modeling of Perceptual Decision Making.  
506 In: Busemeyer JR, Wang Z, Townsend JT, Eidels A, editors. *The Oxford Handbook of*  
507 *Computational and Mathematical Psychology.* New York, NY: Oxford University Press; 2015.  
508 pp. 320–340.
- 509 33. Stewart TC, Bekolay T, Eliasmith C. Learning to Select Actions with Spiking Neurons in the  
510 Basal Ganglia. *Front Neurosci.* 2012;6. doi:10.3389/fnins.2012.00002
- 511 34. Rasmussen D, Eliasmith C. A spiking neural model applied to the study of human  
512 performance and cognitive decline on Raven’s Advanced Progressive Matrices. *Intelligence.*  
513 2014;42: 53–82. doi:10.1016/j.intell.2013.10.003
- 514 35. Kajić I, Gosmann J, Stewart TC, Wennekers T, Eliasmith C. A Spiking Neuron Model of  
515 Word Associations for the Remote Associates Test. *Front Psychol.* 2017;8: 48.



A SPIKING-NEURON MODEL OF ACTIVITY-SILENT WORKING MEMORY

- 516 36. Lewis-Peacock JA, Drysdale AT, Oberauer K, Postle BR. Neural evidence for a distinction  
517 between short-term memory and the focus of attention. *J Cogn Neurosci*. 2012;24: 61–79.  
518 doi:10.1162/jocn\_a\_00140
- 519 37. Oberauer K. Design for a working memory. In: Ross BH, editor. *Psychology of Learning and*  
520 *Motivation*. Academic Press; 2009. pp. 45–100.
- 521 38. Cowan N. *Attention and memory: An integrated framework*. New York: Oxford University  
522 Press; 1995.
- 523 39. McElree B. Working memory and focal attention. *J Exp Psychol Learn Mem Cogn*. 2001;27:  
524 817–835.
- 525 40. Anderson JR. *How Can the Human Mind Occur in the Physical Universe?* New York: Oxford  
526 University Press; 2007.
- 527 41. Nijboer M, Borst JP, Van Rijn H, Taatgen NA. Contrasting Single and Multi-Component  
528 Working-Memory Systems in Dual Tasking. *Cogn Psychol*. 2016;86: 1–26.  
529 doi:10.1016/j.cogpsych.2016.01.003
- 530 42. Borst JP, Taatgen NA, Stocco A, Van Rijn H. The Neural Correlates of Problem States:  
531 Testing fMRI Predictions of a Computational Model of Multitasking. *PLoS One*. 2010;5:  
532 e12966. Available: <http://dx.doi.org/10.1371/journal.pone.0012966>
- 533 43. Borst JP, Taatgen NA, Van Rijn H. What Makes Interruptions Disruptive? A Process-Model  
534 Account of the Effects of the Problem State Bottleneck on Task Interruption and Resumption.  
535 *Proc CHI*. Seoul, Korea: ACM Press; 2015.
- 536 44. Stokes MG, Kusunoki M, Sigala N, Nili H, Gaffan D, Duncan J. Dynamic Coding for  
537 Cognitive Control in Prefrontal Cortex. *Neuron*. 2013;78: 364–375.  
538 doi:10.1016/j.neuron.2013.01.039
- 539 45. Singh R, Eliasmith C. Higher-dimensional neurons explain the tuning and dynamics of  
540 working memory cells. *J Neurosci*. 2006;26: 3667–3678. doi:10.1523/JNEUROSCI.4864-  
541 05.2006
- 542 46. Fuster J. *The prefrontal cortex*. 5th ed. New York, NY: Elsevier; 2015.

A SPIKING-NEURON MODEL OF ACTIVITY-SILENT WORKING MEMORY

- 543 47. Sreenivasan KK, Vytlačil J, D'Esposito M. Distributed and dynamic storage of working  
544 memory stimulus information in extrastriate cortex. *J Cogn Neurosci*. 2014;26: 1141–1153.  
545 doi:10.1162/jocn\_a\_00556
- 546 48. Pasternak T, Greenlee MW. Working memory in primate sensory systems. *Nat Rev Neurosci*.  
547 2005;6: 97–107. doi:10.1038/nrn1603
- 548 49. Tripp BP, Eliasmith C. Population models of temporal differentiation. *Neural Comput*.  
549 2010;22: 621–659. doi:10.1162/neco.2009.02-09-970
- 550 50. Eliasmith C, Anderson CH. *Neural Engineering: Computation, Representation, and Dynamics*  
551 *in Neurobiological Systems*. Cambridge, MA: The MIT Press; 2002.
- 552 51. Peirce J, Gray JR, Simpson S, MacAskill M, Höchenberger R, Sogo H, et al. PsychoPy2:  
553 Experiments in behavior made easy. *Behav Res Methods*. 2019;51: 195–203.  
554 doi:10.3758/s13428-018-01193-y  
555
